# Supplementary material
Source: publisher figshare collection journal article supplement (https://tandf.figshare.com/ndownloader/files/21101442)
Supplement: Supplementary file 1 [file 21101442]

**Appendix 2.** Analysed countries and the number of reported non-native tree species growing in forests and in provenance trials.

| Country | Number of species in forests | Number of species in provenance trials | Total number of species (forests + provenance trials) |
| --- | --- | --- | --- |
| Albania | 15 | 0 | 15 |
| Austria | 24 | 8 | 26 |
| Belarus | 21 | 0 | 21 |
| Belgium | 11 | 9 | 13 |
| Bosnia & Herzegovina | 5 | 0 | 5 |
| Bulgaria | 13 | 1 | 13 |
| Croatia | 11 | 5 | 14 |
| Cyprus | 6 | 0 | 6 |
| Czech Republic | 12 | 7 | 13 |
| Denmark | 11 | 3 | 11 |
| Estonia | 0 | 0 | 0 |
| Finland | 4 | 5 | 5 |
| France | 47 | 9 | 47 |
| Germany | 9 | 13 | 15 |
| Greece | 7 | 7 | 10 |
| Hungary | 18 | 2 | 18 |
| Iceland | 6 | 0 | 6 |
| Ireland | 6 | 2 | 6 |
| Italy | 87 | 7 | 87 |
| Latvia | 4 | 0 | 4 |
| Lithuania | 13 | 0 | 13 |
| Macedonia | 13 | 1 | 13 |
| Moldova | 1 | 0 | 1 |
| Montenegro | 3 | 0 | 3 |
| Netherlands | 9 | 1 | 9 |
| Norway | 11 | 1 | 11 |
| Poland | 34 | 1 | 34 |
| Portugal | 4 | 2 | 4 |
| Romania | 18 | 3 | 18 |
| Russia (Kaliningrad) | 14 | 0 | 14 |
| Serbia | 8 | 5 | 10 |
| Slovakia | 11 | 1 | 11 |
| Slovenia | 23 | 1 | 23 |
| Spain | 9 | 4 | 10 |
| Sweden | 9 | 3 | 9 |
| Switzerland | 5 | 1 | 5 |
| Ukraine | 37 | 2 | 39 |
| United Kingdom | 10 | 17 | 18 |
